# Supplementary material for: Determinants of tetanus, pneumococcal and influenza vaccination in the elderly: a representative cross-sectional study on knowledge, attitude and practice (KAP)
Source: Springer Nature journal article supplement (doi:10.1186/s12889-016-2784-8), 2015-12-01
Supplement: MOESM5 [file 9751416]

#### Additional file 5- Characteristics of scores

| <b>Score</b>               | <b>Knowledge</b>   | <b>Attitude</b>   | <b>Practice</b>   |
|----------------------------|--------------------|-------------------|-------------------|
| <b>Obs</b>                 | 1223               | 1107              | 1174              |
| <b>Mean (SD)</b>           | 0.7 (1.0)          | 14.3 (6.0)        | 6.2 (3.2)         |
| <b>Min/Max</b>             | 0/4                | -4/29             | 0/23              |
| <b>Median</b>              | 0                  | 14                | 6.5               |
| <b>Scores, dichotomous</b> |                    |                   |                   |
|                            | <b>Knowledge=1</b> | <b>Attitude=1</b> | <b>Practice=1</b> |
| <b>N (%)</b>               | 441 (36.1)         | 547 (49.4)        | 636 (52.0)        |
