# Supplementary material for: Determinants of tetanus, pneumococcal and influenza vaccination in the elderly: a representative cross-sectional study on knowledge, attitude and practice (KAP)
Source: BMC Public Health. 2016 Feb 4;16:121. doi: 10.1186/s12889-016-2784-8 (PMC4743086; doi:10.1186/s12889-016-2784-8)
Supplement: Supplementary file 1 — List of all variables in the data set used in analyses, original coding and recoding. Description: lists all variables that were used in these analyses. Original coding and recoding are provided. Descriptions of the variables are given. (PDF 648 kb) [file 12889_2016_2784_MOESM1_ESM.pdf]

**Additional file 1: List of all variables in the data set used in analyses, original coding and recoding**

| Name                     | Description                                                                                                     | Original coding                                                                                                                                                                                                                                                                                                                              | Recoding                                                                                                                                                                               | Comment                                                                                                                                                                                                                                                                                                           |
|--------------------------|-----------------------------------------------------------------------------------------------------------------|----------------------------------------------------------------------------------------------------------------------------------------------------------------------------------------------------------------------------------------------------------------------------------------------------------------------------------------------|----------------------------------------------------------------------------------------------------------------------------------------------------------------------------------------|-------------------------------------------------------------------------------------------------------------------------------------------------------------------------------------------------------------------------------------------------------------------------------------------------------------------|
| <b>Socio-demographic</b> |                                                                                                                 |                                                                                                                                                                                                                                                                                                                                              |                                                                                                                                                                                        |                                                                                                                                                                                                                                                                                                                   |
| age                      | age in years                                                                                                    | year of birth                                                                                                                                                                                                                                                                                                                                | 2012-year of birth                                                                                                                                                                     |                                                                                                                                                                                                                                                                                                                   |
|                          | age in five-year increments                                                                                     |                                                                                                                                                                                                                                                                                                                                              | in five-year increments                                                                                                                                                                |                                                                                                                                                                                                                                                                                                                   |
| sex                      | sex                                                                                                             | 1=male<br>2=female                                                                                                                                                                                                                                                                                                                           | 0=female<br>1=male                                                                                                                                                                     |                                                                                                                                                                                                                                                                                                                   |
| Migration background     | Any migration background of the participant or his/her parents                                                  | Each question: all countries mentioned were coded as one variable, with codings<br>0=no<br>1=yes                                                                                                                                                                                                                                             | 0=no migration background<br>1=migration background                                                                                                                                    | Describes whether a participant was born in Germany, has the German nationality, whether his/her parents are of German nationality, and whether parents were born in Germany. If at least one of these criteria was not applicable, the participant was considered as having migration background (coded with 1). |
| Education                | School education                                                                                                | 1=no graduation<br>2=Certificate of Secondary Education (9 yrs schooling)<br>3=General Certificate of Secondary Education (10 yrs schooling)<br>4=Polytechnic Secondary School<br>5=Polytechnic degree<br>6=general qualification for university entrance<br>7=Advanced technical college or University<br>8=other<br>9=Don't know/No answer | 1 and 2→1= no graduation/Certificate of Secondary Education<br>3 and 4→2= General Certificate of Secondary Education<br>5, 6 and 7→3= polytechnic degree or higher<br>8 and 9→ missing |                                                                                                                                                                                                                                                                                                                   |
| Place of residence       | Describes whether the participant lives in the eastern (newly-formed German states) or western part of Germany. | Community-indicator, continuous                                                                                                                                                                                                                                                                                                              | 0=Western part of Germany<br>1=Eastern part of Germany (incl. Berlin)                                                                                                                  | Federal state (first two digits) was extracted and allocated to east and west of Germany.                                                                                                                                                                                                                         |
| <b>Health related</b>    |                                                                                                                 |                                                                                                                                                                                                                                                                                                                                              |                                                                                                                                                                                        |                                                                                                                                                                                                                                                                                                                   |
| Subjective health status | Rating of own health                                                                                            | 1=very good<br>2=good<br>3=average<br>4=bad<br>5=very bad<br>6=Don't know/ No                                                                                                                                                                                                                                                                | 1=(very) good<br>2= average<br>3=(very) bad                                                                                                                                            |                                                                                                                                                                                                                                                                                                                   |

|                                                             |                                                                                                                                                                          |                                                                                                                                                                                             |                                                 |
|-------------------------------------------------------------|--------------------------------------------------------------------------------------------------------------------------------------------------------------------------|---------------------------------------------------------------------------------------------------------------------------------------------------------------------------------------------|-------------------------------------------------|
|                                                             |                                                                                                                                                                          | answer                                                                                                                                                                                      |                                                 |
| Chronic condition                                           | Information on chronic condition of the participant (not further specified)                                                                                              | 1=yes<br>2=no<br>3=Don't know/ No answer                                                                                                                                                    | 0=No<br>1=Yes                                   |
| Recommendation by a physician                               | A physician has recommended to get vaccinated during the previous 12 months                                                                                              | 1=Yes<br>2=No<br>3=Don't know/ No answer                                                                                                                                                    | 0=No<br>1=Yes                                   |
| <b>Knowledge</b>                                            |                                                                                                                                                                          |                                                                                                                                                                                             |                                                 |
| Perceived information level                                 | How the participant perceives his/her information level regarding vaccinations in adulthood                                                                              | 1= Very good<br>2=Good<br>3=Less good<br>4=Bad<br>5=Don't know/ No answer                                                                                                                   | 1 and 2→0=(very) good<br>3 and 4→1=(rather) bad |
| Recommendations by STIKO                                    | Knowledge on who is in charge of official vaccine recommendations                                                                                                        | 1= Federal Ministry of Health and its technical authorities<br>2=Pharmaceutical industry<br>3= health insurance companies<br>4= committee of independent experts<br>5=Don't know/ No answer | 0=Wrong<br>4→1=Correct                          |
| Awareness of official influenza-campaign by BZgA/RKI        | Awareness of the official influenza vaccination campaign run by the BZgA/RKI: Ever seen/read posters, advertisement in magazine or information brochure                  | 1=Yes, read or seen<br>2=No<br>3=Don't know/ No answer                                                                                                                                      | 0=No<br>1=Yes                                   |
| Awareness of brochure by BZgA/RKI                           | Ever seen/read the brochure of the BZgA/RKI about immunization protection for the whole family                                                                           | 1=Yes, read or seen<br>2=No<br>3=Don't know/ No answer                                                                                                                                      | 0=No<br>1=Yes                                   |
| Awareness of official measles-campaign by BZgA              | Awareness of the official Measles-Mumps-Rubella vaccination campaign by the BZgA: Ever seen/read brochures/posters                                                       | 1=Yes, read or seen<br>2=No<br>3=Don't know/ No answer                                                                                                                                      | 0=No<br>1=Yes                                   |
| Recommendation for pneumococcal vaccination known, if asked | Interviewer mentioned the official recommendation for pneumococcal vaccination for persons > 59 years and asked whether the participant was aware of this recommendation | 1=Yes<br>2=No<br>3=Don't know/ No answer                                                                                                                                                    | 0=No<br>1=Yes                                   |
| Recommendation for influenza vaccination                    | Interviewer mentioned the official                                                                                                                                       | 1=Yes<br>2=No                                                                                                                                                                               | 0=No<br>1=Yes                                   |

|                                                            |                                                                                                                                               |                                                                                                            |                                                            |                                                                                                                          |
|------------------------------------------------------------|-----------------------------------------------------------------------------------------------------------------------------------------------|------------------------------------------------------------------------------------------------------------|------------------------------------------------------------|--------------------------------------------------------------------------------------------------------------------------|
| known, if asked                                            | recommendation for influenza vaccination for persons > 59 years and asked afterwards whether the participant was aware of this recommendation | 3=Don't know/ No answer                                                                                    |                                                            |                                                                                                                          |
| Recommendation Tetanus-vaccination known, spontaneous      | Does the participant know spontaneously that the tetanus vaccination is recommended in adulthood                                              | 0=Not mentioned<br>1=mentioned                                                                             | 0=No<br>1=Yes                                              | It was asked which vaccinations have to be repeated in adulthood, every possible answer was coded in a separate variable |
| Recommendation Diphtheria-vaccination known, spontaneous   | Does the participant know spontaneously that the diphtheria vaccination is recommended in adulthood                                           | 0=Not mentioned<br>1=mentioned                                                                             | 0=No<br>1=Yes                                              | It was asked which vaccinations have to be repeated in adulthood, every possible answer was coded in a separate variable |
| Recommendation Influenza-vaccination known, spontaneous    | Does the participant know spontaneously that the influenza vaccination is recommended in adulthood                                            | 0=Not mentioned<br>1=mentioned                                                                             | 0=No<br>1=Yes                                              | It was asked which vaccinations have to be repeated in adulthood, every possible answer was coded in a separate variable |
| Recommendation Pneumococcal-vaccination known, spontaneous | Does the participant know spontaneously that the pneumococcal vaccination is recommended in adulthood                                         | 0=Not mentioned<br>1=mentioned                                                                             | 0=No<br>1=Yes                                              | It was asked which vaccinations have to be repeated in adulthood, every possible answer was coded in a separate variable |
| Recommended Tetanus-vaccination time interval              | In which time interval the tetanus vaccination has to be repeated according to participants opinion                                           | 1=once<br>2=every ten years<br>3=every three to five years<br>4=every year<br>5=Don't know/No answer       | 0=wrong (incl. not mentioned)<br>1=right (every ten years) | If a vaccination in the question above was mentioned, it was asked, in which time interval it has to be repeated         |
| Recommended Diphtheria-vaccination time interval           | In which time interval the diphtheria vaccination has to be repeated according to participants opinion                                        | 1=once<br>2=every ten years<br>3=every three to five years<br>4=every year<br>5=Don't know/No answer       | 0=wrong (incl. not mentioned)<br>1=right (every ten years) | If a vaccination in the question above was mentioned, it was asked, in which time interval it has to be repeated         |
| Recommended Influenza-vaccination-time interval            | In which time interval the influenza vaccination has to be repeated according to participants opinion                                         | 1=once<br>2=every ten years<br>3=every three to five years<br>4=every year<br>5=Don't know/No answer       | 0=wrong (incl. not mentioned)<br>1=right (every year)      | If a vaccination in the question above was mentioned, it was asked, in which time interval it has to be repeated.        |
| <b>Attitude</b>                                            |                                                                                                                                               |                                                                                                            |                                                            |                                                                                                                          |
| Attitude towards vaccinations                              | Attitude towards vaccinations in general                                                                                                      | 1=negative<br>2=rather negative<br>3=neutral<br>4=rather positive<br>5=positive<br>6=Don't know/ No answer | 1=(rather) negative<br>2=neutral<br>3=(rather) positive    |                                                                                                                          |
| Trust in official vaccination                              | Trust in persons who are responsible for                                                                                                      | 1=Yes<br>2=No                                                                                              | 0=No<br>1=Yes                                              |                                                                                                                          |

|                                                                                                                                                                                                                                                                          |                                                                               |                                          |                                      |                                                                                                                                                              |
|--------------------------------------------------------------------------------------------------------------------------------------------------------------------------------------------------------------------------------------------------------------------------|-------------------------------------------------------------------------------|------------------------------------------|--------------------------------------|--------------------------------------------------------------------------------------------------------------------------------------------------------------|
| recommendations                                                                                                                                                                                                                                                          | official vaccination recommendations:<br>Are their decisions evidence-based?  | 3=Don't know/ No answer                  |                                      |                                                                                                                                                              |
| <i>Appropriate source of information</i>                                                                                                                                                                                                                                 | Appropriate source of information regarding vaccinations and hygiene          | 1=Yes<br>2=No<br>3=Don't know/ No answer | 0=No<br>1=Yes                        | Participant indicated yes/no according to source.                                                                                                            |
| -Internet<br>-Physician<br>-Physician's assistant<br>-Brochure<br>-Newspaper/magazine<br>-TV<br>-Informations in schools<br>-Friends<br>-Family<br>-Federal and national state authorities<br>-Pharmaceutical enterprises<br>-Health office<br>-Health insurance company |                                                                               |                                          |                                      |                                                                                                                                                              |
| <i>Vaccination due to</i>                                                                                                                                                                                                                                                | <i>Motivation for a vaccination that was given in the previous five years</i> | 1=Yes<br>2=No<br>3=Don't know/No answer  | 0=No (incl. no vaccination)<br>1=Yes | Participant indicated yes/no according to source.                                                                                                            |
| - Vaccination due to media information<br>- Vaccination to protect others<br>- Vaccination due to occupational exposure<br>- Vaccination due to travel<br>- Vaccination due to Recommendation                                                                            |                                                                               |                                          |                                      |                                                                                                                                                              |
| →Recommendation by                                                                                                                                                                                                                                                       | Source of recommendation of vaccination that led to vaccination               | 0= No<br>1=Yes                           | 0=No<br>1=Yes                        | If answer to Motivation recommendation was yes, it was asked by whom. Multiple answers were possible. Every possible answer was coded in a separate variable |
| - Vaccination due to physician recommendation<br>- Vaccination due to recommendation by Health insurance company<br>- Vaccination due to family member recommendation<br>- Vaccination due to recommendation by friends<br>- Vaccination due to recommendation by others |                                                                               |                                          |                                      |                                                                                                                                                              |
| <i>Barriers to vaccine</i>                                                                                                                                                                                                                                               | <i>Reasons for not</i>                                                        | 1=Yes                                    | 0=No (incl.no                        | If Participant refused a                                                                                                                                     |

| <i>uptake</i>                                                                          | <i>getting vaccinated</i>                                           | <i>2=No<br/>3=Don't know/ No<br/>answer</i>           | <i>vaccination refused)<br/>1=Yes</i>                   | <i>vaccination in previous<br/>years, it was asked<br/>why. Participant<br/>indicated yes/no<br/>according to reason.<br/>Every possible answer<br/>was coded in a<br/>separate variable.</i>                                       |
|----------------------------------------------------------------------------------------|---------------------------------------------------------------------|-------------------------------------------------------|---------------------------------------------------------|-------------------------------------------------------------------------------------------------------------------------------------------------------------------------------------------------------------------------------------|
| -Barrier to vaccine<br><i>uptake</i> : disease<br>perceived as harmless                |                                                                     |                                                       |                                                         |                                                                                                                                                                                                                                     |
| -Barrier to vaccine<br><i>uptake</i> : fear of side<br>effects                         |                                                                     |                                                       |                                                         |                                                                                                                                                                                                                                     |
| -Barrier to vaccine<br><i>uptake</i> : fear of needles                                 |                                                                     |                                                       |                                                         |                                                                                                                                                                                                                                     |
| - Barrier to vaccine<br><i>uptake</i> : forgotten<br>appointment                       |                                                                     |                                                       |                                                         |                                                                                                                                                                                                                                     |
| - Barrier to vaccine<br><i>uptake</i> : belief that<br>vaccine offers no<br>protection |                                                                     |                                                       |                                                         |                                                                                                                                                                                                                                     |
| -Barrier to vaccine<br><i>uptake</i> : discouraged<br>by physician opinion             |                                                                     |                                                       |                                                         |                                                                                                                                                                                                                                     |
| -Barrier to vaccine<br><i>uptake</i> : discouraged<br>by family/friends<br>opinion     |                                                                     |                                                       |                                                         |                                                                                                                                                                                                                                     |
| -Barrier to vaccine<br><i>uptake</i> : critical reports<br>in media                    |                                                                     |                                                       |                                                         |                                                                                                                                                                                                                                     |
| -Barrier to vaccine<br><i>uptake</i> : too much<br>effort                              |                                                                     |                                                       |                                                         |                                                                                                                                                                                                                                     |
| -Barrier to vaccine<br><i>uptake</i> : general<br>objection                            | general objection<br>against vaccination                            |                                                       |                                                         |                                                                                                                                                                                                                                     |
| <i>Barriers to influenza<br/>vaccine uptake</i>                                        | <i>Reasons for not<br/>getting vaccinated<br/>against influenza</i> | <i>1=Yes<br/>2=No<br/>3=Don't know/ No<br/>answer</i> | <i>0=No (incl.no<br/>vaccination refused)<br/>1=Yes</i> | <i>If Participant did not<br/>receive influenza<br/>vaccination annually,<br/>reasons were asked.<br/>Participant indicated<br/>yes/no according to<br/>source. Every possible<br/>answer was coded in a<br/>separate variable.</i> |
| - Barrier to influenza<br>vaccine uptake:<br>disease harmless                          | Disease is perceived<br>harmless                                    |                                                       |                                                         |                                                                                                                                                                                                                                     |
| - Barrier to influenza<br>vaccine uptake : fear<br>of side effects                     | Fear of side effects                                                |                                                       |                                                         |                                                                                                                                                                                                                                     |
| - Barrier to influenza<br>vaccine uptake: fear of<br>needles                           | Fear of needles                                                     |                                                       |                                                         |                                                                                                                                                                                                                                     |
| - Barrier to influenza<br>vaccine uptake:<br>forgotten appointment                     |                                                                     |                                                       |                                                         |                                                                                                                                                                                                                                     |
| - Barrier to influenza<br>vaccine uptakea: belief<br>that vaccine offers no            | vaccination does not<br>provide protection                          |                                                       |                                                         |                                                                                                                                                                                                                                     |

|                                                                         |                                                                                       |                                                                                                     |                                                            |                                                                                                           |
|-------------------------------------------------------------------------|---------------------------------------------------------------------------------------|-----------------------------------------------------------------------------------------------------|------------------------------------------------------------|-----------------------------------------------------------------------------------------------------------|
| protection                                                              |                                                                                       |                                                                                                     |                                                            |                                                                                                           |
| - Barrier to influenza vaccine uptake: contraindication                 | Participant cannot be vaccinated against influenza due to (possible) contraindication |                                                                                                     |                                                            |                                                                                                           |
| - Barrier to influenza vaccine uptake: discouraged by physician opinion |                                                                                       |                                                                                                     |                                                            |                                                                                                           |
| - Barrier to influenza vaccine uptake: received no information          | Participant did not know about the recommendation                                     |                                                                                                     |                                                            |                                                                                                           |
| - Barrier to influenza vaccine uptake: does not belong to target group  | Participant does not think he is in the target group                                  |                                                                                                     |                                                            |                                                                                                           |
| <i>Rating importance of particular vaccination</i>                      | <i>How important is it to be vaccinated against:</i>                                  | 1=Very important<br>2=important<br>3=Not important<br>4=Don't know/ No answer                       | 0=Not important/don't know<br>1=(very) important           | <i>Perceived importance of vaccination was asked according to vaccination.</i>                            |
| Perceived importance of tetanus-vaccination                             |                                                                                       |                                                                                                     |                                                            |                                                                                                           |
| Perceived importance of diphtheria-vaccination                          |                                                                                       |                                                                                                     |                                                            |                                                                                                           |
| Perceived importance of influenza-vaccination                           |                                                                                       |                                                                                                     |                                                            |                                                                                                           |
| Perceived importance of pneumococcal-vaccination                        |                                                                                       |                                                                                                     |                                                            |                                                                                                           |
| Health consciousness                                                    | How much attention is paid to own health                                              | 1=very strong<br>2=strong<br>3=mediocre<br>4=less strong<br>5=not at all<br>6=Don't know/ No answer | 1= (very) strong<br>2=mediocre<br>3=less strong/not at all |                                                                                                           |
| <b>Practice</b>                                                         |                                                                                       |                                                                                                     |                                                            |                                                                                                           |
| Consulted web page „Impfen-Info.de“                                     |                                                                                       | 1=Yes<br>2=No<br>3=Don't know/ No answer                                                            | 0=No<br>1=Yes                                              |                                                                                                           |
| Possession of a vaccination record                                      |                                                                                       | 1=Yes<br>2=No<br>3=Don't know/ No answer                                                            | 0=No<br>1=Yes                                              |                                                                                                           |
| Consulting advice on vaccination                                        | Consulted advice on vaccination in previous two years                                 | 1=Yes<br>2=No<br>3=Don't know/ No answer                                                            | 0=No<br>1=Yes                                              |                                                                                                           |
| <i>Consulting advice on vaccination from</i>                            | <i>Who gave advice?</i>                                                               | 1=Yes<br>2=No<br>3=Don't know/ No answer                                                            | 0=No<br>1=Yes                                              | <i>If Participant consulted advice for vaccination during the previous two years, it was asked where.</i> |
| Physician                                                               |                                                                                       |                                                                                                     |                                                            |                                                                                                           |
| Pharmacist                                                              |                                                                                       |                                                                                                     |                                                            |                                                                                                           |
| physician's assistant                                                   |                                                                                       |                                                                                                     |                                                            |                                                                                                           |
| Travel medicine clinic                                                  |                                                                                       |                                                                                                     |                                                            |                                                                                                           |
| Health office                                                           |                                                                                       |                                                                                                     |                                                            |                                                                                                           |

|                                                                                                                                                                                                                |                                                                 |                                          |                                             |                                                                                                                                                                                                                                       |
|----------------------------------------------------------------------------------------------------------------------------------------------------------------------------------------------------------------|-----------------------------------------------------------------|------------------------------------------|---------------------------------------------|---------------------------------------------------------------------------------------------------------------------------------------------------------------------------------------------------------------------------------------|
| Health insurance company                                                                                                                                                                                       |                                                                 |                                          |                                             |                                                                                                                                                                                                                                       |
| Refusal of some vaccinations                                                                                                                                                                                   | Participant refused at least one vaccination in previous years  | 1=Yes<br>2=No<br>3=Don't know/ No answer | 0=No<br>1=Yes                               |                                                                                                                                                                                                                                       |
| Any vaccination during previous five years                                                                                                                                                                     | Participant received any vaccination during previous five years | 1=Yes<br>2=No<br>3=Don't know/ No answer | 0=No<br>1=Yes                               |                                                                                                                                                                                                                                       |
| <i>Specific vaccinations during previous five years</i>                                                                                                                                                        |                                                                 | 1=Yes<br>2=No<br>3=Don't know/ No answer | 0=No (incl. no vaccination at all)<br>1=Yes |                                                                                                                                                                                                                                       |
| Tetanus-vaccination during previous five years<br>Diphtheria-vaccination during previous five years<br>Influenza-vaccination during previous five years<br>Pneumococcal-vaccination during previous five years |                                                                 |                                          |                                             |                                                                                                                                                                                                                                       |
| Ever received influenza vaccination                                                                                                                                                                            | Participant has ever been vaccinated against influenza          |                                          | 0=No<br>1=Yes                               | Variable was calculated:<br>0= Influenza vaccination during previous five years=0 & Influenza more than five years ago (not used in analysis)=0//<br>1=Influenza vaccination during previous five years or more than five years ago=1 |
| Receipt of annual influenza vaccination                                                                                                                                                                        | Participant gets vaccinated against influenza annually          | 1=Yes<br>2=No<br>3=Don't know/ No answer | 0=No<br>1=Yes                               |                                                                                                                                                                                                                                       |
| Intention to get influenza-vaccination                                                                                                                                                                         | Intention to get vaccinated against influenza next season       | 1=Yes<br>2=No<br>3=Don't know/ No answer | 0=No<br>1=Yes                               | Only asked if participant ≥60 yrs. or if health care worker                                                                                                                                                                           |
