# Supplementary material for: Determinants of tetanus, pneumococcal and influenza vaccination in the elderly: a representative cross-sectional study on knowledge, attitude and practice (KAP)
Source: BMC Public Health. 2016 Feb 4;16:121. doi: 10.1186/s12889-016-2784-8 (PMC4743086; doi:10.1186/s12889-016-2784-8)
Supplement: Supplementary file 2 — Variables included in the factor analyses. Description: lists all variables that were included in the factor analyses in the areas of knowledge, attitude and practices. (PDF 880 kb) [file 12889_2016_2784_MOESM2_ESM.pdf]

## Additional file 2- Variables included in the factor analyses

| Knowledge                                                   | Attitude                                                                      | Practice                                             |
|-------------------------------------------------------------|-------------------------------------------------------------------------------|------------------------------------------------------|
| Recommendation Influenza-vaccination-time interval if asked | Health consciousness                                                          | Any vaccination during previous five years           |
| Activator for Influenza-vaccination                         | Perceived importance of Diphteria-vaccination                                 | Tetanus-vaccination during previous five years       |
| Recommendations by STIKO                                    | Perceived importance of Pertussis-vaccination                                 | Diphteria-vaccination during previous five years     |
| Recommendation Pertussis-vaccination if asked               | Perceived importance of Polio-vaccination                                     | Pneumococcal-vaccination during previous five years  |
| Recommendation Influenza-vaccination if asked               | Perceived importance of Hepatitis B-vaccination                               | Pertussis-vaccination during previous five years     |
| Recommendation Pneumococcal-vaccination if asked            | Perceived importance of Measles-vaccination                                   | Polio-vaccination during previous five years         |
| Recommendation Amarillic typhus-vaccination, spontaneous    | Perceived importance of Mumps-vaccination                                     | Hepatitis B-vaccination during previous five years   |
| Recommendation Diphteria-vaccination, spontaneous           | Perceived importance of Rubella-vaccination                                   | Measles-vaccination during previous five years       |
| Recommendation Hepatitis-A/B-vaccination, spontaneous       | Perceived importance of Varicella-vaccination                                 | Mumps-vaccination during previous five years         |
| Recommendation Influenza-vaccination, spontaneous           | Perceived importance of Meningococci-vaccination                              | Rubella-vaccination during previous five years       |
| Recommendation Pertussis-vaccination, spontaneous           | Perceived importance of Influenza-vaccination                                 | Varicella-vaccination during previous five years     |
| Recommendation Pneumococcal-vaccinations, spontaneous       | Perceived importance of Pneumococcal-vaccination                              | Meningococcal-vaccination during previous five years |
| Recommendation Tetanus-vaccination, spontaneous             | Vaccination due to physician recommendation                                   | Influenza-vaccination during previous five years     |
| Recommendation Influenza-vaccination-time interval          | Vaccination due to recommendation by Health insurance company                 | Influenza-vaccination ever                           |
| Recommended Diphteria-vaccination time interval             | Vaccination due to family member recommendation                               | Influenza-vaccination annually                       |
| Recommended Tetanus-vaccination time interval               | Vaccination due to friends recommendation                                     | intention to receive influenza-vaccination           |
| Perceived information level                                 | Vaccination due to recommendation by others                                   | Visited website                                      |
| Awareness of official influenza-campaign by BZgA/RKI        | Vaccination due to media information                                          | How many times visited website                       |
| Awareness of brochure by BZgA/RKI                           | Vaccination to protect others                                                 | Possession vaccination record                        |
| Awareness of official measles-campaign by BZgA              | Vaccination due to occupational exposure                                      | Knowing where vaccination record is                  |
|                                                             | Vaccination due to travel                                                     | Vaccination consultation                             |
|                                                             | Barrier to influenza vaccine uptake: disease perceived as harmless            | Vaccination consultation by Physician                |
|                                                             | Barrier to influenza vaccine uptake: fear of side effects                     | Vaccination consultation by Pharmacist               |
|                                                             | Barrier to influenza vaccine uptake: fear of needles                          | Vaccination consultation by physician's assistant    |
|                                                             | Barrier to influenza vaccine uptake: forgot appointment                       | Vaccination consultation by Travel medicine clinic   |
|                                                             | Barrier to influenza vaccine uptake: belief that vaccine offers no protection | Vaccination consultation by Health office            |
|                                                             | Barrier to influenza vaccine uptake: contraindication                         | Vaccination consultation by Health insurance company |
|                                                             | Barrier to influenza vaccine uptake: discouraged by physician opinion         | Refused vaccination                                  |
|                                                             | Barrier to influenza vaccine uptake: received no information                  |                                                      |
|                                                             | Barrier to influenza vaccine uptake: does not belong to target group          |                                                      |
|                                                             | Preference of activator influenza vaccine                                     |                                                      |

|  |                                                                     |  |
|--|---------------------------------------------------------------------|--|
|  | Trust in official recommendations                                   |  |
|  | Barrier to vaccine uptake: disease perceived as harmless            |  |
|  | Barrier to vaccine uptake: fear of side effects                     |  |
|  | Barrier to vaccine uptake: fear of needles                          |  |
|  | Barrier to vaccine uptake: forgot appointment                       |  |
|  | Barrier to vaccine uptake: belief that vaccine offers no protection |  |
|  | Barrier to vaccine uptake: discouraged by physician opinion         |  |
|  | Barrier to vaccine uptake: discouraged by family/friends opinion    |  |
|  | Barrier to vaccine uptake: critical reports in media                |  |
|  | Barrier to vaccine uptake: too much effort                          |  |
|  | Barrier to vaccine uptake: general objection                        |  |
|  | Interest in further information                                     |  |
|  | Interest in further information about side effects                  |  |
|  | Interest in further information about mode of functioning           |  |
|  | Interest in further information about period of effect              |  |
|  | Interest in further information about recommendations               |  |
|  | Interest in further information about new developments              |  |
|  | Interest in further information about assumption of costs           |  |
|  | Internet appropriate                                                |  |
|  | Physician appropriate                                               |  |
|  | Physician's assistant appropriate                                   |  |
|  | Brochure appropriate                                                |  |
|  | Newspaper/magazine appropriate                                      |  |
|  | TV appropriate                                                      |  |
|  | Informations in schools appropriate                                 |  |
|  | Friends appropriate                                                 |  |
|  | Family appropriate                                                  |  |
|  | Federal and national state authorities appropriate                  |  |
|  | Pharmaceutical enterprises appropriate                              |  |
|  | Health office appropriate                                           |  |
|  | Health insurance company appropriate                                |  |
|  | Social networks appropriate                                         |  |
|  | Attitude towards vaccinations                                       |  |
