# Supplementary material for: Determinants of tetanus, pneumococcal and influenza vaccination in the elderly: a representative cross-sectional study on knowledge, attitude and practice (KAP)
Source: BMC Public Health. 2016 Feb 4;16:121. doi: 10.1186/s12889-016-2784-8 (PMC4743086; doi:10.1186/s12889-016-2784-8)
Supplement: Supplementary file 3 — Further description of KAP in the study population. Description: provides details on vaccination-related knowledge, attitude and practices in the study population (n = 1 223). (PDF 404 kb) [file 12889_2016_2784_MOESM3_ESM.pdf]

### Additional file 3- Further description of KAP in the study population (n=1 223)

| Variable                                             | N (%)       |
|------------------------------------------------------|-------------|
| Knowledge                                            |             |
| Subjectively informed                                |             |
| (Rather) good                                        | 738 (64.0)  |
| (Rather) bad                                         | 426 (34.8)  |
| Missings/Don't know                                  | 14 (1.1)    |
| Official recommendations by STIKO                    |             |
| Wrong/Don't know                                     | 1026 (83.9) |
| Correct                                              | 197 (16.1)  |
| Recommendation pneumococcal vaccination if asked     |             |
| No                                                   | 878 (71.8)  |
| Yes                                                  | 345 (28.2)  |
| Recommendation influenza vaccination if asked        |             |
| No                                                   | 251 (20.5)  |
| Yes                                                  | 965 (78.9)  |
| Missings                                             | 7 (0.6)     |
| Recommendation Tetanus-vaccination, spontaneous      |             |
| No                                                   | 332 (27.2)  |
| Yes                                                  | 891 (72.9)  |
| Recommendation Diphtheria-vaccination, spontaneous   |             |
| No                                                   | 1043 (85.3) |
| Yes                                                  | 180 (14.7)  |
| Recommendation Pneumococcal-vaccination, spontaneous |             |
| No                                                   | 1154 (94.4) |
| Yes                                                  | 69 (5.6)    |
| Recommendation Influenza- vaccination, spontaneous   |             |
| No                                                   | 258 (21.1)  |
| Yes                                                  | 965 (78.9)  |
| Attitude                                             |             |
| Attitude towards vaccinations                        |             |
| (Rather) negative                                    | 118 (9.7)   |
| Neutral                                              | 336 (27.5)  |
| (Rather) positive                                    | 766 (62.6)  |
| Missings/Don't know                                  | 3 (0.3)     |
| Trust in official recommendations                    |             |
| No                                                   | 488 (40.0)  |
| Yes                                                  | 677 (55.4)  |
| Missings/Don't know                                  | 58 (4.7)    |
| Health conscious                                     |             |
| (very) strong                                        | 798 (65.3)  |
| Mediocre                                             | 375 (30.7)  |
| less strong/not at all                               | 49 (4.0)    |
| Missings/Don't know                                  | 1 (0.1)     |
| Appropriate source of information                    |             |
| Physician                                            | 1114 (91.1) |
| Missings/Don't know                                  | 11 (0.9)    |
| Health insurance company                             | 904 (73.9)  |
| Missings/Don't know                                  | 15 (1.2)    |
| TV                                                   | 833 (68.1)  |
| Missings/Don't know                                  | 15 (1.2)    |
| Newspaper/magazine                                   | 760 (62.1)  |
| Missings/Don't know                                  | 9 (0.8)     |
| Family                                               | 718 (58.7)  |
| Missings/Don't know                                  | 12 (1.0)    |
| Brochure                                             | 715 (58.5)  |
| Missings/Don't know                                  | 17 (1.4)    |
| Health office                                        | 715 (58.5)  |
| Missings/Don't know                                  | 21 (1.7)    |
| Physician Assistant                                  | 636 (52.0)  |
| Missings/Don't know                                  | 16 (1.3)    |
| Friends                                              | 631 (51.6)  |

|                                            |             |
|--------------------------------------------|-------------|
| Missings/Don't know                        | 11 (0.9)    |
| Federal and Federal State Authorities      | 611 (50.0)  |
| Missings/Don't know                        | 31 (2.5)    |
| Informations in schools                    | 443 (36.2)  |
| Missings/Don't know                        | 29 (2.4)    |
| Internet                                   | 418 (34.2)  |
| Missings/Don't know                        | 24 (2.0)    |
| Pharmaceutical enterprises                 | 145 (11.9)  |
| Missings/Don't know                        | 18 (1.5)    |
| Social networks                            | 91 (7.4)    |
| Missings/Don't know                        | 34 (2.8)    |
| Motivation                                 |             |
| Recommendation                             | 507 (41.5)  |
| Missings/Don't know                        | 5 (0.4)     |
| Recommendation by physician                | 461 (36.9)  |
| Missings/Don't know                        | 0 (0)       |
| TV                                         | 448 (36.6)  |
| Missings/Don't know                        | 24 (2.0)    |
| Vacation                                   | 389 (31.8)  |
| Missings/Don't know                        | 4 (0.3)     |
| Work                                       | 233 (19.5)  |
| Missings/Don't know                        | 8 (0.7)     |
| Protection of others                       | 128 (10.5)  |
| Missings/Don't know                        | 17 (1.4)    |
| Recommendation by family                   | 30 (2.5)    |
| Recommendation by others                   | 28 (2.3)    |
| Recommendation by friends                  | 12 (1.0)    |
| Recommendation by Health insurance company | 4 (0.3)     |
| Barriers                                   |             |
| Disease harmless                           | 116 (9.5)   |
| Missings/Don't know                        | 5 (0.4)     |
| Side effects                               | 95 (7.8)    |
| Missings/Don't know                        | 1 (0.1)     |
| No protection                              | 93 (7.6)    |
| Missings/Don't know                        | 7 (0.6)     |
| Critical reports in media                  | 58 (4.7)    |
| Missings/Don't know                        | 4 (0.3)     |
| Forgot appointment                         | 57 (4.7)    |
| Missings/Don't know                        | 1 (0.1)     |
| General objection                          | 41 (3.4)    |
| Missings/Don't know                        | 1 (0.1)     |
| Discouraged by physician opinion           | 39 (3.2)    |
| Missings/Don't know                        | 2 (0.2)     |
| Too much effort                            | 25 (2.0)    |
| Missings/Don't know                        | 2 (0.2)     |
| Discouraged by family/friends opinion      | 23 (1.9)    |
| Missings/Don't know                        | 1 (0.1)     |
| Needles                                    | 6 (0.5)     |
| Missings/Don't know                        | 1 (0.1)     |
| Rating importance by vaccine type          |             |
| Tetanus (very) important                   | 1178 (96.3) |
| Diphtheria (very) important                | 840 (68.7)  |
| Influenza (very) important                 | 704 (57.6)  |
| Pneumococcal (very) important              | 614 (50.2)  |
| Practice                                   |             |
| Possession vaccination record              | 1048 (85.7) |
| Missings/Don't know                        | 10 (0.8)    |
| Vaccination consultation                   | 271 (22.2)  |
| Missings/Don't know                        | 3 (0.3)     |
| Refused vaccination                        | 254 (20.8)  |
| Missings/Don't know                        | 22 (1.8)    |
| Any vaccination during previous five years | 881 (72.0)  |
| Missings/Don't know                        | 5 (0.4)     |

|                                                     |            |
|-----------------------------------------------------|------------|
| Tetanus-vaccination during previous five years      | 688 (56.3) |
| Missings/Don't know                                 | 8 (0.7)    |
| Diphtheria-vaccination during previous five years   | 139 (11.4) |
| Missings/Don't know                                 | 23 (1.9)   |
| Pneumococcal-vaccination during previous five years | 140 (11.5) |
| Missings/Don't know                                 | 22 (1.8)   |
| Influenza-vaccination during previous five years    | 629 (51.4) |
| Missings/Don't know                                 | 1 (0.1)    |
| Influenza-vaccination ever                          | 817 (66.8) |
| Missings/Don't know                                 | 3 (0.3)    |
| Influenza-vaccination annually                      | 586 (47.9) |
| Missings/Don't know                                 | 3 (0.3)    |
| Vaccination consultation by                         |            |
| Physician                                           | 266 (21.8) |
| Physician's Assistant                               | 22 (1.8)   |
| Travel medicine clinic                              | 20 (1.6)   |
| Pharmacist                                          | 14 (1.1)   |
| Health office                                       | 8 (0.7)    |
| Health insurance company                            | 12 (0.1)   |
