# Supplementary material for: Determinants of tetanus, pneumococcal and influenza vaccination in the elderly: a representative cross-sectional study on knowledge, attitude and practice (KAP)
Source: BMC Public Health. 2016 Feb 4;16:121. doi: 10.1186/s12889-016-2784-8 (PMC4743086; doi:10.1186/s12889-016-2784-8)
Supplement: Supplementary file 4 — Details on results of factor analyses. Description: describes in detail the generated factors which are the basis for the scores used in further analyses including KMO, Bartlett, Eigenvalue, factor loading, included variables, Cronbach’s alpha, mean and standard deviation. (PDF 441 kb) [file 12889_2016_2784_MOESM4_ESM.pdf]

#### Additional file 4- Details on results of factor analyses

| Knowledge: Promax: KMO=0.6=mediocre; Bartlett<0.001                       |                                                                 |                                                          |                                              |                                                            |                                         |
|---------------------------------------------------------------------------|-----------------------------------------------------------------|----------------------------------------------------------|----------------------------------------------|------------------------------------------------------------|-----------------------------------------|
| <b>Factor Eigenvalue (% of variance)</b>                                  | <b>1-Influenza 2.2 (11.3%)</b>                                  | <b>2-Diphtheria 1.7 (8.8%)</b>                           |                                              |                                                            |                                         |
| <b>Variable (rotated factor loading)</b>                                  | Recommendation Influenza-vaccination, spontaneous (0.9)         | Recommendation Diphtheria-vaccination, spontaneous (0.8) |                                              |                                                            |                                         |
|                                                                           | Recommended Influenza-vaccination-time interval (0.9)           | Recommended Diphtheria-vaccination-time interval (0.7)   |                                              |                                                            |                                         |
| <b>Cronbachs alpha &gt;= 60 yrs (all)</b>                                 | <b>0.97 (0.97)</b>                                              | <b>0.85 (0.92)</b>                                       |                                              |                                                            |                                         |
| <b>Obs /Mean (SD)</b>                                                     | <b>1223 /0.47 (0.83)</b>                                        | <b>1223/ 0.24 (0.60)</b>                                 |                                              |                                                            |                                         |
| Attitude towards vaccination: Promax: KMO<0.9=meritorious; Bartlett<0.001 |                                                                 |                                                          |                                              |                                                            |                                         |
| <b>Factor Eigenvalue (% of variance)</b>                                  | <b>1-Interest in further information 7.1 (10.3%)</b>            | <b>2- Importance 4.3 (6.3%)</b>                          | <b>3-Source of information 2.6 (3.8%)</b>    | <b>4-Influenza-vaccination+ all vaccination 2.4 (3.5%)</b> | <b>5-Barriers 1.8 (2.6%)</b>            |
| <b>Variable (rotated factor loading)</b>                                  | Interest in further information (1.0)                           | Measles vaccination important (0.8)                      | Brochure appropriate (0.6)                   | Influenza vaccination important (0.7)                      | Barrier side effects (0.8)              |
|                                                                           | Interest in further information about period of effect (1.0)    | Mumps vaccination important (0.7)                        | Federal and national state authorities (0.5) | Barrier influenza: no protection (-0.6)                    | Barrier no protection (0.7)             |
|                                                                           | Interest in further information about side effects (1.0)        | Rubella vaccination important (0.7)                      | TV appropriate (0.5)                         | Barrier influenza: disease harmless (-0.5)                 | Barrier critical reports in media (0.6) |
|                                                                           | Interest in further information about mode of functioning (0.9) | Diphtheria vaccination important (0.7)                   | Newspaper/magazine appropriate (0.5)         | Attitude towards vaccination (0.5)                         | Barrier disease harmless (0.6)          |
|                                                                           | Interest in further information about recommendations (0.9)     | Varicella vaccination important (0.7)                    | Health office appropriate (0.5)              | Barrier influenza: no target group (-0.5)                  |                                         |
|                                                                           | Interest in further information about assumption of costs (0.9) | Polio vaccination important (0.7)                        | Health insurance company appropriate (0.5)   | Barrier influenza: side effects (-0.5)                     |                                         |
|                                                                           | Interest in further information about new developments (0.9)    | Pertussis vaccination important (0.6)                    | Family appropriate (0.5)                     |                                                            |                                         |
|                                                                           |                                                                 | Meningococci vaccination important (0.4)                 | Friends appropriate (0.5)                    |                                                            |                                         |
|                                                                           |                                                                 | Hepatitis B-vaccination important (0.4)                  | Physician assistance appropriate (0.4)       |                                                            |                                         |
| <b>Cronbachs</b>                                                          | <b>0.98 (0.97)</b>                                              | <b>0.86 (0.83)</b>                                       | <b>0.74 (0.68)</b>                           | <b>0.72 (0.60)</b>                                         | <b>0.77 (0.77)</b>                      |

|                                                                         |                                                              |                                                                  |                                                   |                                                 |                                                                 |
|-------------------------------------------------------------------------|--------------------------------------------------------------|------------------------------------------------------------------|---------------------------------------------------|-------------------------------------------------|-----------------------------------------------------------------|
| <i>alpha</i> >= 60<br>yrs (all)                                         |                                                              |                                                                  |                                                   |                                                 |                                                                 |
| <i>Obs /Mean<br/>(SD)</i>                                               | 1223/ 1.15 (2.43)                                            | 1223 / 5.51 (2.94)                                               | 1157 / 5.40 (2.49)                                | 1177 / 2.33<br>(1.81)                           | 1210/ 0.28<br>(0.79)                                            |
| Vaccination related practices; Promax: KMO<0.8=middling; Bartlett<0.001 |                                                              |                                                                  |                                                   |                                                 |                                                                 |
| <i>Factor<br/>Eigenvalue<br/>(% of<br/>variance)</i>                    | 1-Influenza+ any<br>vaccination 4.5<br>(16.5%)               | 2-Other vaccinations<br>2.4 (8.8%)                               | 3-Vaccination<br>consultation 1.8 (6.6%)          | 4-Vaccination<br>record 1.4<br>(5.0%)           | 5-Consulted<br>webpage<br>„Impfen-<br>Info.de“ 1.3<br>(4.9%)    |
| <i>Variable<br/>(rotated<br/>factor<br/>loading)</i>                    | Influenza vaccination<br>during previous five<br>years (1.0) | Measles vaccination<br>during previous five<br>years (0.8)       | Vaccination<br>consultation (1.0)                 | Knowing where<br>vaccination<br>record is (0.9) | How often<br>consulted<br>webpage<br>„Impfen-<br>Info.de“ (0.9) |
|                                                                         | Influenza vaccination<br>annually (0.9)                      | Rubella vaccination<br>during previous five<br>years (0.7)       | Vaccination<br>consultation by<br>physician (1.0) | Possession<br>vaccination<br>record (0.8)       | Consulted<br>webpage<br>„Impfen-<br>Info.de“ (0.8)              |
|                                                                         | Influenza vaccination<br>ever (0.7)                          | Mumps vaccination<br>during previous five<br>years (0.7)         |                                                   |                                                 |                                                                 |
|                                                                         | Any vaccination<br>during previous five<br>years (0.7)       | Varicella vaccination<br>during previous five<br>years (0.6)     |                                                   |                                                 |                                                                 |
|                                                                         | Tetanus vaccination<br>during previous five<br>years (0.4)   | Pertussis vaccination<br>during previous five<br>years (0.5)     |                                                   |                                                 |                                                                 |
|                                                                         |                                                              | Polio vaccination<br>during previous five<br>years (0.4)         |                                                   |                                                 |                                                                 |
|                                                                         |                                                              | Diphtheria<br>vaccination during<br>previous five years<br>(0.4) |                                                   |                                                 |                                                                 |
| <i>Cronbachs<br/>alpha</i> >= 60<br>yrs (all)                           | 0.86 (0.81)                                                  | 0.71 (0.80)                                                      | 0.99 (0.98)                                       | 0.72 (0.62)                                     | 0.71 (0.78)                                                     |
| <i>Obs /Mean<br/>(SD)</i>                                               | 1206 /2.96 (1.93)                                            | 1200/ 0.39 (0.88)                                                | 1220 / 0.44 (0.83)                                | 1213 / 2.41<br>(1.08)                           | 1223 / 0.05<br>(0.42)                                           |
